# Supplementary material for: Destabilization of chromosome structure by histone H3 lysine 27 methylation
Source: PubMed Central journal article supplement (PMC6510446; doi:10.1371/journal.pgen.1008093), 2019-04-22
Supplement: pgen.1008093.s013.pdf [file pgen.1008093.s013.pdf]

# **Destabilization of chromosome structure by histone H3 lysine 27 methylation**

Mareike Möller<sup>1,2</sup>, Klaas Schotanus<sup>3</sup>, Jessica L. Soyer<sup>4</sup>, Janine Haueisen<sup>1,2</sup>, Kathrin Happ<sup>1</sup>, Maja Stralucke<sup>1</sup>, Petra Happel<sup>5</sup>, Kristina M. Smith<sup>6</sup>, Lanelle R. Connolly<sup>7</sup>, Michael Freitag<sup>7</sup>, Eva H. Stukenbrock<sup>1,2\*</sup>

<sup>1</sup> Environmental Genomics, Christian-Albrechts University, Am Botanischen Garten 1-9, D-24118 Kiel, Germany

<sup>2</sup> Max Planck Fellow Group Environmental Genomics, Max Planck Institute for Evolutionary Biology, D-24306 Plön, Germany

<sup>3</sup> Department of Molecular Genetics and Microbiology, Duke University Medical Center, Durham, North Carolina, United States of America

<sup>4</sup> UMR BIOGER, INRA, AgroParisTech, Université Paris-Saclay, 78850 Thiverval-Grignon, France

<sup>5</sup> Max Planck Institute for Terrestrial Microbiology, Karl-von-Frisch-Straße 10, D-35043 Marburg, Germany

<sup>6</sup> Department of Biology, Oregon State University - Cascades, Bend, OR 97702, United States of America

<sup>7</sup> Department of Biochemistry and Biophysics, Oregon State University, Corvallis, OR 97331-7305, United States of America

## **Supplementary text S1.** Data analysis – programs and commands used for analysis of ChIP-seq, RNA-seq and genome sequencing data.

### **1. ChIP-sequencing**

#### **Quality filtering**

FASTX Toolkit - version 0.0.14 ([http://hannonlab.cshl.edu/fastx\\_toolkit/](http://hannonlab.cshl.edu/fastx_toolkit/))

removal of remaining adapter sequences (if necessary)

```
fastx_clipper -C -M 40 -a adapter_sequence -v -i input.fastq -o output.fastq
```

trim low quality bases (-f6 for 50 nt reads, -f8 for 150 nt reads samples)

```
fastx_trimmer -Q33 -f6/8 -v -i input.fastq -o output.fastq
```

remove low quality reads

```
fastq_quality_filter -Q33 -v -q 20 -p 80 -i input.fastq -o output.fastq
```

#### **Mapping**

bowtie2 version 2.1.0 [1]

```
bowtie2 -p 6 -x reference_genome -U quality_filtered_input.fastq -S output.sam
```

#### **Converting to bam files and sorting**

Samtools version 1.5 [2]

```
samtools view -@ 6 -Sb input.sam > output.bam
```

```
samtools sort -@ 6 input.bam > output_sorted.bam
```

```
samtools index input_sorted.bam
```

#### **Visualization of data**

deeptools version 2.5.3 [3]

data is normalized to 1x coverage

```
bamCoverage --bam input_sorted.bam -o output.bw -p 6 --normalizeTo1x 39686251
```

```
--ignoreForNormalization chr_18 --binSize 10 --extendReads 150
```

## Peak calling

Homer version 4.9 [4]

**makeTagDirectory** name\_tag\_directory -mapq 1 input.sam

H3K4me2

**findPeaks** name\_tag\_directory -style histone -region -size 1000 -minDist 500 -C 0 > output\_peaks.txt

H3K9me3 and H3K27me3

**findPeaks** name\_tag\_directory -style histone -region -size 2000 -minDist 2000 -C 0 > output\_peaks.txt

convert .txt to .bed

**pos2bed.pl** input\_peaks.txt > output\_peaks.bed

## ChIP peak analysis

bedtools version 2.25.0 [5]

merge peaks of replicates, output is overlapping regions

**bedtools intersect** -a input\_replicate1\_peaks.bed -b input\_replicate2\_peaks.bed > output\_peaks\_intersect.bed

compute genome coverage of identified peaks

**bedtools genomcov** -i input\_peaks\_intersect.bed -g reference.genome > output\_intersect\_genomecoverage.txt

annotate overlap of peaks with genes or transposable elements

**bedtools annotate** -i genes/TEs.bed -files input\_peaks\_intersect.bed > input\_peaks\_intersect\_overlap\_genes/TEs.txt

## 2. RNA-sequencing

### Quality Filtering

Trimmomatic version 0.33 [6]

keep only 150bp reads

```
java -jar trimmomatic-0.33.jar SE -phred33 input.fastq output.fastq MINLEN:150
```

trim low quality bases

```
java -jar trimmomatic-0.33.jar SE -phred33 input.fastq output.fastq HEADCROP:15
```

FASTX Toolkit version 0.0.14 ([http://hannonlab.cshl.edu/fastx\\_toolkit/](http://hannonlab.cshl.edu/fastx_toolkit/))

```
fastq_quality_filter -Q33 -v -q 20 -p 80 -i input.fastq -o output.fastq
```

```
fastq_masker -q 20 -r N -v -Q33 -i input.fastq -o output.fastq
```

### Mapping

hisat2 (version 2.0.3-beta) [7]

dataset is reverse-stranded, maximum intron length is set to 1500 bp

```
hisat2 -p8 --rna-strandness R --max-intronlen 1500 -x reference_genome -U input_masked.fastq -S output.sam
```

### Converting to bam files and sorting

Samtools version 1.5 [2]

```
samtools view -@ 6 -Sb input.sam > output.bam
```

```
samtools sort -@ 6 input.bam > output_sorted.bam
```

```
samtools index input_sorted.bam
```

### Count reads on features

htseq version 0.6.0 [8]

count reads on genes using the sorted bam files

```
htseq-count -f bam -m union -type=gene --idattr=Name --stranded=reverse input_sorted.bam reference.gff > output.txt
```

## Calculate RPKM values

cuffdiff version 2.1.1 [9]

```
cuffdiff -p 6 -L cond1,cond2,cond3,cond4 --library-norm-method geometric --dispersion-method per-condition reference.gff  
cond1_rep1_sorted.bam,cond1_rep2_sorted.bam  
cond2_rep1_sorted.bam,cond2_rep2_sorted.bam  
cond3_rep1_sorted.bam,cond3_rep2_sorted.bam  
cond4_rep1_sorted.bam,cond4_rep2_sorted.bam
```

## 3. Genome sequencing

### Quality Filtering

Trimmomatic (version 0.36) [6]

```
java -jar trimmomatic-0.36.jar PE -threads 8 -phred33 input_R1.fastq.gz input_R2.fastq.gz  
output_R1_paired.fastq output_R1_unpaired.fastq output_R2_paired.fastq output_R2_unpaired.fastq  
HEADCROP:5 CROP:145 LEADING:3 TRAILING:3 SLIDINGWINDOW:4:15 MINLEN:50
```

### Mapping

bowtie2 version 2.1.0 [1]

```
bowtie2 -p 8 -x reference_genome -1 input_R1_paired.fastq -2 input_R2_paired.fastq -S output.sam
```

### Converting to bam files and sorting

samtools version 1.5 [2]

```
samtools view -@ 6 -Sb input.sam > output.bam  
samtools sort -@ 6 input.bam > output_sorted.bam  
samtools index input_sorted.bam
```

### Visualization of data

deeptools version 2.5.3 [3]

data is normalized to 1x coverage

```
bamCoverage --bam input_sorted.bam -o output.bw --binSize 10 --normalizeTo1x 39686251
```

## Detecting structural variation

speedseq version 0.1.2 [10]

```
speedseq align -t 6 -R "@RG\tID:id\tSM:sample\tLB:lib" \  
reference_genome.fasta \  
input_R1_paired.fastq \  
input_R2_paired.fastq
```

lumpy version 0.2.13 [11]

```
lumpyexpress -B speedseq_output_paired.fastq.bam -S speedseq_output_paired.fastq.splitters.bam -D  
speedseq_output_paired.fastq.discordants.bam -o output_lumpy.vcf
```

## References

1. Langmead B, Salzberg SL. Fast gapped-read alignment with Bowtie 2. *Nat Methods*. 2012;9: 357–359.
2. Li H. A statistical framework for SNP calling, mutation discovery, association mapping and population genetical parameter estimation from sequencing data. *Bioinformatics*. 2011;27: 2987–2993.
3. Ramírez F, Ryan DP, Grüning B, Bhardwaj V, Kilpert F, Richter AS, et al. deepTools2: a next generation web server for deep-sequencing data analysis. *Nucleic Acids Res*. 2016;44: W160–W165.
4. Heinz S, Benner C, Spann N, Bertolino E, Lin YC, Laslo P, et al. Simple Combinations of Lineage-Determining Transcription Factors Prime cis-Regulatory Elements Required for Macrophage and B Cell Identities. *Mol Cell*. Elsevier Inc.; 2010;38: 576–589.
5. Quinlan AR, Hall IM. BEDTools: a flexible suite of utilities for comparing genomic features. *Bioinformatics*. 2010;26: 841–842.
6. Bolger AM, Lohse M, Usadel B. Trimmomatic: A flexible trimmer for Illumina sequence data. *Bioinformatics*. 2014;30: 2114–2120.
7. Kim D, Langmead B, Salzberg SL. HISAT: a fast spliced aligner with low memory requirements. *Nat Methods*. 2015;12: 357–60.
8. Anders S, Pyl PT, Huber W. HTSeq-A Python framework to work with high-throughput sequencing data. *Bioinformatics*. 2015;31: 166–169.
9. Trapnell C, Williams BA, Pertea G, Mortazavi A, Kwan G, van Baren MJ, et al. Transcript assembly and quantification by RNA-Seq reveals unannotated transcripts and isoform switching during cell differentiation. *Nat Biotechnol*. 2010;28: 511–515.
10. Chiang C, Layer RM, Faust GG, Lindberg MR, Rose DB, Garrison EP, et al. SpeedSeq: Ultra-fast personal genome analysis and interpretation. *Nat Methods*. 2015;12: 966–968.
11. Layer RM, Chiang C, Quinlan AR, Hall IM. LUMPY: A probabilistic framework for structural variant discovery. *Genome Biol*. 2014;15: 1–19.
