# Supplementary material for: Destabilization of chromosome structure by histone H3 lysine 27 methylation
Source: PubMed Central journal article supplement (PMC6510446; doi:10.1371/journal.pgen.1008093), 2019-04-22

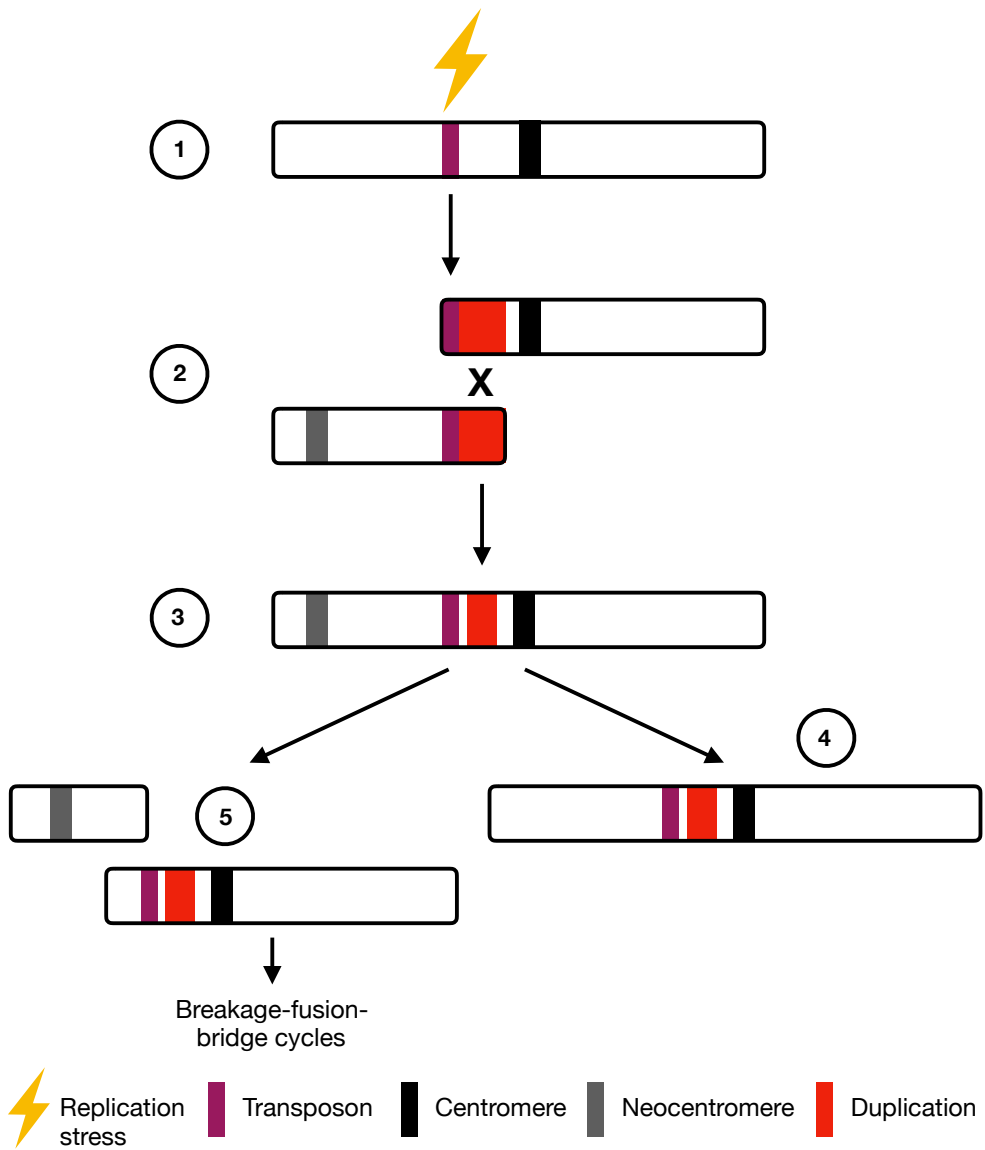

Supplement: pgen.1008093.s024.pdf [file pgen.1008093.s024.pdf]
