# Supplementary material for: Destabilization of chromosome structure by histone H3 lysine 27 methylation
Source: PLoS Genet. 2019 Apr 22;15(4):e1008093. doi: 10.1371/journal.pgen.1008093 (PMC6510446; doi:10.1371/journal.pgen.1008093)
Supplement: S2 Table — (XLSX) [file pgen.1008093.s002.xlsx]

## Sheet: Sheet1
S2 Table. Statistics and overview of sequencing data generated in this study.
strain	total number of reads	reads after filtering	% filtered	mapped	mapped unique	% mapped unique	Mapped > 1	% mapped > 1	% mapped total	sequencer	paired (PE) or single (SE) end	read length (nt)
RNA-seq
Zt09_1	20994159	19521923	7.01	16434638	12210307	74.3	4224331	25.7	84.19	Illumina HiSeq3000	SE	150
Zt09_2	22923092	21556050	5.96	18384479	13636481	74.17	4747998	25.83	85.29	Illumina HiSeq3000	SE	150
∆kmt1_68_1	21846593	20436339	6.46	17201756	12636948	73.46	4564808	26.54	84.17	Illumina HiSeq3000	SE	150
∆kmt1_80_2	21103333	19592955	7.16	16491570	12185945	73.89	4305625	26.11	84.17	Illumina HiSeq3000	SE	150
∆kmt6_283_1	23703679	22265052	6.07	19094648	14326425	75.03	4768223	24.97	85.76	Illumina HiSeq3000	SE	150
∆kmt6_365_2	21940374	20452376	6.78	17433614	12980320	74.46	4453294	25.54	85.24	Illumina HiSeq3000	SE	150
∆k1/6_23_1	21452463	20046195	6.56	17449778	12972895	74.34	4476883	25.66	87.05	Illumina HiSeq3000	SE	150
∆k1/6_116_2	22963447	21432353	6.67	18532428	13265984	71.58	5266444	28.42	86.47	Illumina HiSeq3000	SE	150
ChIP-seq
Zt09_H3K4_1_1	14367744	14324110	0.303694	1.37998e+07	1.24364e+07	90.12	858351	6.22	96.34	Illumina HiSeq3000	SE	50
Zt09_H3K4_1_2	13481807	13440985	0.302793	1.30579e+07	1.19114e+07	91.22	774334	5.93	97.15	Illumina HiSeq3000	SE	50
Zt09_H3K9_1_1	6643558	6628279	0.229982	6.44401e+06	2.35529e+06	36.55	3.91023e+06	60.68	97.22	Illumina HiSeq3000	SE	50
Zt09_H3K9_1_2	6260343	6242715	0.281582	6.03983e+06	2.29091e+06	37.93	3.55323e+06	58.83	96.75	Illumina HiSeq3000	SE	50
Zt09_H3K27_1_1	14197774	14034693	1.14864	1.36501e+07	9.33397e+06	68.38	3.94353e+06	28.89	97.26	Illumina HiSeq3000	SE	50
Zt09_H3K27_1_2	14413280	14374262	0.270709	1.40695e+07	9.84867e+06	70	3.92399e+06	27.89	97.88	Illumina HiSeq3000	SE	50
Zt09_H3K4_2	13851801	13714297	0.99268	1.35045e+07	1.23417e+07	91.39	956116	7.08	98.47	Illumina HiSeq3000	SE	150
Zt09_H3K9_2	16031745	15856195	1.09501	1.55169e+07	7.92447e+06	51.07	7.26034e+06	46.79	97.86	Illumina HiSeq3000	SE	150
Zt09_H3K27_2	13660302	13521025	1.01957	1.32709e+07	1.02597e+07	77.31	2.76433e+06	20.83	98.15	Illumina HiSeq3000	SE	150
△kmt1_80_H3K4_1	43145115	43029185	0.268698	4.16996e+07	3.83261e+07	91.91	2.08498e+06	5	96.91	Illumina HiSeq3000	SE	50
△kmt1_80_H3K4_2	23689845	23620657	0.292058	2.30136e+07	2.12416e+07	92.3	1.1806e+06	5.13	97.43	Illumina HiSeq3000	SE	50
△kmt1_80_H3K9_1	6245876	6164869	1.29697	4.31109e+06	2.26203e+06	52.47	753148	17.47	69.93	Illumina HiSeq3000	SE	50
△kmt1_80_H3K9_2	31837195	31442082	1.24104	2.00066e+07	8.7969e+06	43.97	3.9333e+06	19.66	63.63	Illumina HiSeq3000	SE	50
△kmt1_80_H3K27_1	17453371	17239804	1.22364	1.63606e+07	1.1207e+07	68.5	4.31756e+06	26.39	94.9	Illumina HiSeq3000	SE	50
△kmt1_80_H3K27_2	13976739	13927494	0.352335	1.33384e+07	8.44852e+06	63.34	4.32563e+06	32.43	95.77	Illumina HiSeq3000	SE	50
△kmt1_68_H3K4	16348663	16187224	0.987475	1.587e+07	1.46543e+07	92.34	890304	5.61	98.04	Illumina HiSeq3000	SE	150
△kmt1_68_H3K9	16440384	16287428	0.930368	1.59943e+07	1.27138e+07	79.49	2.99412e+06	18.72	98.2	Illumina HiSeq3000	SE	150
△kmt1_68_H3K27	16614902	16450218	0.991182	1.61048e+07	1.06372e+07	66.05	5.12937e+06	31.85	97.9	Illumina HiSeq3000	SE	150
△kmt6_283_H3K4_1	8227353	7206575	12.4071	7.09408e+06	6.97377e+06	98.304	120315	1.69599	98.439	Illumina HiSeq2000	SE	50
△kmt6_365_H3K4_2	7383151	6531271	11.5382	6.49645e+06	6.38872e+06	98.3417	107730	1.65829	99.4668	Illumina HiSeq2000	SE	50
△kmt6_283_H3K9_1	8172715	7361641	9.92417	6.92445e+06	3.08257e+06	44.5172	3.84188e+06	55.4828	94.0612	Illumina HiSeq2000	SE	50
△kmt6_365_H3K9_2	8612271	7754160	9.96382	7.56403e+06	3.60966e+06	47.7214	3.95437e+06	52.2786	97.548	Illumina HiSeq2000	SE	50
△kmt6_283_H3K27_1	6491777	5527818	14.8489	3.54659e+06	3.07557e+06	86.719	471023	13.281	64.159	Illumina HiSeq2000	SE	50
△kmt6_285_H3K4	17939103	17763038	0.981459	1.74753e+07	1.60108e+07	91.62	1.18133e+06	6.76	98.38	Illumina HiSeq3000	SE	150
△kmt6_285_H3K9	14503411	14357957	1.0029	1.40607e+07	7.10068e+06	50.5	6.66901e+06	47.43	97.93	Illumina HiSeq3000	SE	150
△kmt6_285_H3K27	13538137	13413954	0.917283	1.31457e+07	9.93287e+06	75.56	2.94989e+06	22.44	98	Illumina HiSeq3000	SE	150
△k1/6_23_H3K4_1	12219726	12139106	0.659753	1.13319e+07	9.9981e+06	88.23	580191	5.12	93.35	Illumina HiSeq3000	SE	50
△k1/6_23_H3K4_2	28381864	28304110	0.273957	2.73644e+07	2.50001e+07	91.36	1.45852e+06	5.33	96.68	Illumina HiSeq3000	SE	50
△k1/6_23_H3K9_1	19970626	19664924	1.53076	1.35826e+07	7.09825e+06	52.26	2.28323e+06	16.81	69.07	Illumina HiSeq3000	SE	50
△k1/6_23_H3K9_2	51098273	50427224	1.31325	3.74321e+07	2.19165e+07	58.55	5.86936e+06	15.68	74.23	Illumina HiSeq3000	SE	50
△k1/6_23_H3K27_1	8118371	7998779	1.4731	4.16496e+06	1.83592e+06	44.08	332781	7.99	52.07	Illumina HiSeq3000	SE	50
△k1/6_23_H3K27_2	6817707	6629393	2.76213	4.15663e+06	2.22588e+06	53.55	380332	9.15	62.7	Illumina HiSeq3000	SE	50
△k1/6_116_H3K4_1	6436431	6361433	1.16521	2.31874e+06	725071	31.27	120111	5.18	36.45	Illumina HiSeq3000	SE	50
△k1/6_116_H3K4_2	7891414	7797998	1.18377	4.09785e+06	1.93173e+06	47.14	221694	5.41	52.55	Illumina HiSeq3000	SE	50
△k1/6_116_H3K9_1	15803265	15630650	1.09227	5.93652e+06	1.78274e+06	30.03	472547	7.96	37.98	Illumina HiSeq3000	SE	50
△k1/6_116_H3K9_2	46663575	46167834	1.06237	1.97829e+07	6.99128e+06	35.34	1.4857e+06	7.51	42.85	Illumina HiSeq3000	SE	50
△k1/6_116_H3K27_1	18686829	18453064	1.25096	5.368e+06	1.23196e+06	22.95	329058	6.13	29.09	Illumina HiSeq3000	SE	50
△k1/6_116_H3K27_2	8825847	8705820	1.35995	3.41965e+06	1.10523e+06	32.32	238007	6.96	39.28	Illumina HiSeq3000	SE	50
Genome sequencing
Zt09-1	12108991	11094923	8.3745	1.04437e+07	8481566	76.4455	1976613	17.8155	94.13	Illumina HiSeq2500	PE	100
∆kmt1-1	8337024	7674578	7.94583	6.84189e+06	5423237	70.665	1428791	18.6172	89.15	Illumina HiSeq2500	PE	100
∆kmt6-1	13544205	12370604	8.66497	1.15863e+07	9301580	75.191	2309921	18.6727	93.66	Illumina HiSeq2500	PE	100
Zt09-50-1	15987550	13695302	14.3377	1.24751e+07	10389068	75.8586	2286007	16.6919	91.09	Illumina HiSeq3000	PE	150
Zt09-50-2	15036752	13515036	10.12	1.23906e+07	10369844	76.7282	2185624	16.1718	91.68	Illumina HiSeq3000	PE	150
Zt09-50-3	15938759	14248667	10.6037	1.33482e+07	11158342	78.3115	2343437	16.4467	93.68	Illumina HiSeq3000	PE	150
∆kmt1-50-1	15406107	13481901	12.4899	1.23332e+07	10380361	76.9948	2154425	15.9801	91.48	Illumina HiSeq3000	PE	150
∆kmt1-50-2	16590305	14673373	11.5545	1.33396e+07	11272208	76.8208	2265393	15.4388	90.91	Illumina HiSeq3000	PE	150
∆kmt1-50-3	15823083	14077714	11.0305	1.26742e+07	10729280	76.2146	2113309	15.0117	90.03	Illumina HiSeq3000	PE	150
∆kmt6-50-1	15152435	13338133	11.9737	1.25192e+07	10481239	78.581	2206390	16.542	93.86	Illumina HiSeq3000	PE	150
∆kmt6-50-2	16369420	14464245	11.6386	1.34228e+07	11214384	77.5318	2370843	16.3911	92.8	Illumina HiSeq3000	PE	150
∆kmt6-50-3	15932824	14542885	8.72375	1.34623e+07	11306582	77.7465	2325193	15.9885	92.57	Illumina HiSeq3000	PE	150
∆kmt1-50-1-1	5585553	5121880	8.30129	4.5764e+06	3863709	75.4354	763238	14.9015	89.35	Illumina HiSeq3000	PE	150
∆kmt1-50-2-1	5436755	5025173	7.57036	4.53924e+06	3845457	76.5239	752048	14.9656	90.33	Illumina HiSeq3000	PE	150
∆kmt1-50-2-2	5327549	4924182	7.57134	4.48741e+06	3783883	76.8429	756799	15.369	91.13	Illumina HiSeq3000	PE	150
